# Supplementary material for: A Critical Review of Risk Assessment Models for <em>Listeria monocytogenes</em> in Seafood
Source: Preprints.org preprint supplement (doi:10.20944/preprints202402.0048.v1), 2024-02-01
Supplement: Supplementary file 1 [file supplementary]

## Sheet: Feuil1
Table S1: Accessibility to listeriosis QRA published models for seafood products
Model	Langage	Sharing opportunity	Access to code
Pouillot et al. [8-9]	R	Not specified
Fritsch et al. [10]	Matlab	Not specified
Chen et al. [11]	R	R script (Github)	https://github.com/FSL-MQIP/RegulatoryAndRecallRiskModel_Listeria_ColdSmokedSalmon
FDA-FSIS [5]	Excel Visual Basic	Yes	The modeling software was initially on the JIFSAN clearinghouse website (http://www.foodriskclearinghouse.umd.edu)
Pérez-Rodríguez et al. [12]	@Risk	@risk spreadsheets together with manual	https://zenodo.org/records/822350#.WV5HHmeweUk
Efsa [1]	R	R scripts (Zenodo) and fskx files (RAKIP repository)	https://zenodo.org/records/1117742 and https://knime.bfr.berlin/landingpage/RAKIP-Model-Repository
Lindqvist and Westöö [13]	@Risk	Functions of the spreadsheet are provided in the figure of the article
FAO-WHO [14]	Analytica®	Not specified
Garrido et al. [15]	@Risk	Not specified
Gospavic et al. [16]	Not specified	Not specified
Dass [17]	@Risk	Not specified
Bomfeh et al. [18]	@Risk	Not specified
Pasonen et al. [19]	R associated to openbugs	Not specified
